# Supplementary material for: N 4-Allylcytidine: a new nucleoside analogue for RNA labelling and chemical sequencing
Source: Royal Society of Chemistry journal article supplement (doi:10.1039/d3cb00189j), 2023-11-22
Supplement: d3cb00189j1.pdf [file d3cb00189j1.pdf]

## Supporting Information

### ***N*<sup>4</sup>-Allylcytidine: A New Nucleoside Analogue for RNA Labelling and Chemical Sequencing**

Tengwei Li,<sup>a</sup> Xiao Shu,<sup>a</sup> Minsong Gao,<sup>a</sup> Chenyang Huang,<sup>a</sup> Ting Li,<sup>a</sup> Jie Cao,<sup>ab</sup> Xiner Ying,<sup>a</sup> Donghong Liu,<sup>a</sup> and Jianzhao Liu<sup>\*ab</sup>

- a. MOE Key Laboratory of Macromolecular Synthesis and Functionalization, Department of Polymer Science and Engineering, Zhejiang University, Yuhangtang Road 866, Hangzhou 310058, Zhejiang Province, China
- b. Life Sciences Institute, Zhejiang University, Yuhangtang Road 866, Hangzhou 310058, Zhejiang Province, China

---

## Table of Content

|                                                                                                                 |    |
|-----------------------------------------------------------------------------------------------------------------|----|
| Section I: Characterizations of a <sup>4</sup> C and a <sup>4</sup> CTP and their synthetic intermediates ..... | 2  |
| Section II: Model reactions of a <sup>4</sup> C .....                                                           | 7  |
| Section III: Applications of a <sup>4</sup> C in RNA sequencing .....                                           | 12 |

### Section I: Characterizations of a<sup>4</sup>C and a<sup>4</sup>CTP and their synthetic intermediates

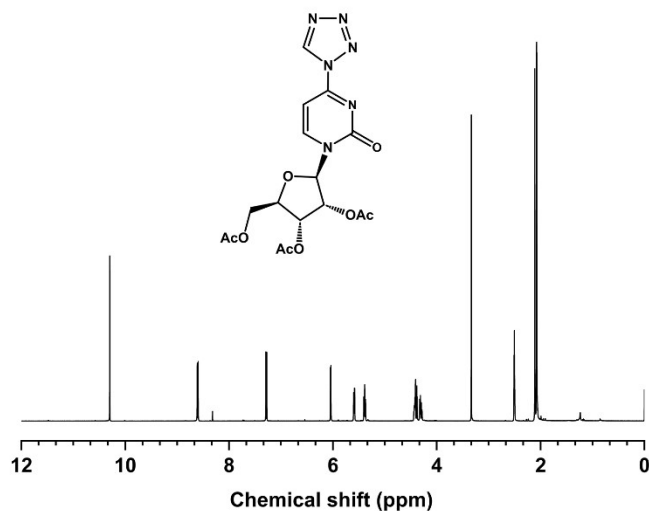

**Figure S1.** <sup>1</sup>H NMR spectrum of 4-(tetrazol-1-yl)-1-(2',3',5'-tri-*O*-acetyl-β-D-ribofuranosyl) pyrimidine-2-(1H)-one (**2**). <sup>1</sup>H NMR (400 MHz, DMSO-*d*<sub>6</sub>), δ (ppm): 10.30 (s, 1H), 8.60 (d, *J* = 7.3 Hz, 1H), 7.28 (d, *J* = 7.2 Hz, 1H), 6.04 (d, *J* = 3.4 Hz, 1H), 5.59 (dd, *J* = 3.3, 6.1 Hz, 1H), 5.39 (t, *J* = 6.5 Hz, 1H), 4.40 (d, *J* = 10.1 Hz, 2H), 4.27 – 4.35 (m, 1H), 2.11 (s, 3H), 2.08 (s, 3H), 2.07 (s, 3H).

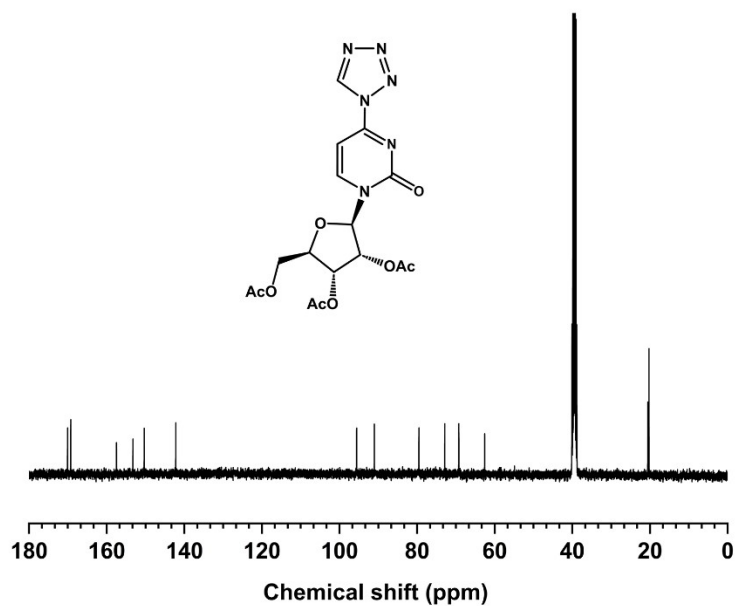

**Figure S2.**  $^{13}\text{C}$  NMR spectrum of 4-(tetrazol-1-yl)-1-(2',3',5'-tri-*O*-acetyl- $\beta$ -D-ribofuranosyl) pyrimidine-2-(1H)-one (**2**).  $^{13}\text{C}$  NMR (100 MHz,  $\text{DMSO-}d_6$ ),  $\delta$  (ppm): 170.1, 169.2, 157.5, 153.2, 150.3, 142.2, 95.6, 91.0, 79.5, 72.9, 69.3, 62.6, 20.6, 20.3

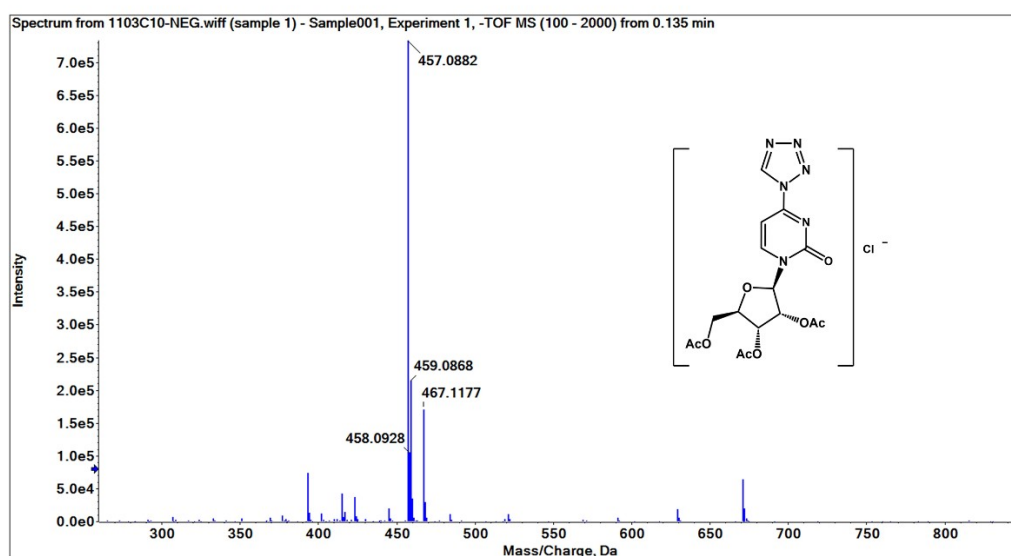

**Figure S3.** High-resolution mass spectrum (HRMS) of 4-(tetrazol-1-yl)-1-(2',3',5'-tri-*O*-acetyl- $\beta$ -D-ribofuranosyl) pyrimidine-2-(1H)-one (**2**). HRMS (ESI),  $m/z$  457.0882 ( $[\text{M}+\text{Cl}]^-$ , calcd 457.0880).

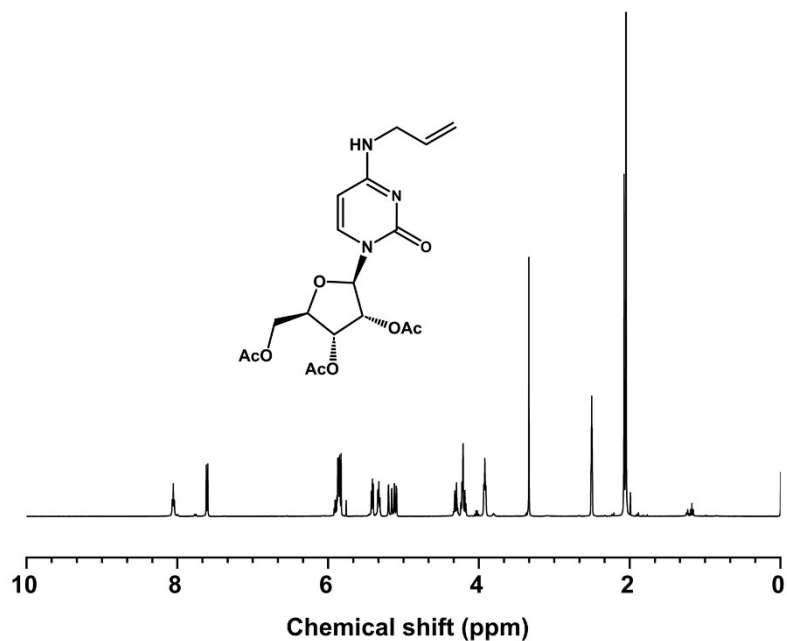

**Figure S4.**  $^1\text{H}$  NMR spectrum of 2',3',5'-tri-*O*-acetyl- $N^4$ -allylcytidine (**3**).  $^1\text{H}$  NMR (400 MHz,  $\text{DMSO-}d_6$ ),  $\delta$  (ppm): 8.05 (t,  $J = 5.6$  Hz, 1H), 7.61 (d,  $J = 7.5$  Hz, 1H), 5.76 – 5.97 (m, 3H), 5.37 – 5.47 (m, 1H), 5.33 (t,  $J = 5.9$  Hz, 1H), 5.18 (dd,  $J = 1.7, 17.2$  Hz, 1H), 5.11 (dd,  $J = 1.7, 10.2$  Hz, 1H), 4.31 (d,  $J = 8.5$  Hz, 1H), 4.13 – 4.26 (m, 2H), 3.86 – 3.98 (m, 2H), 2.07 (s, 3H), 2.05 (s, 6H).

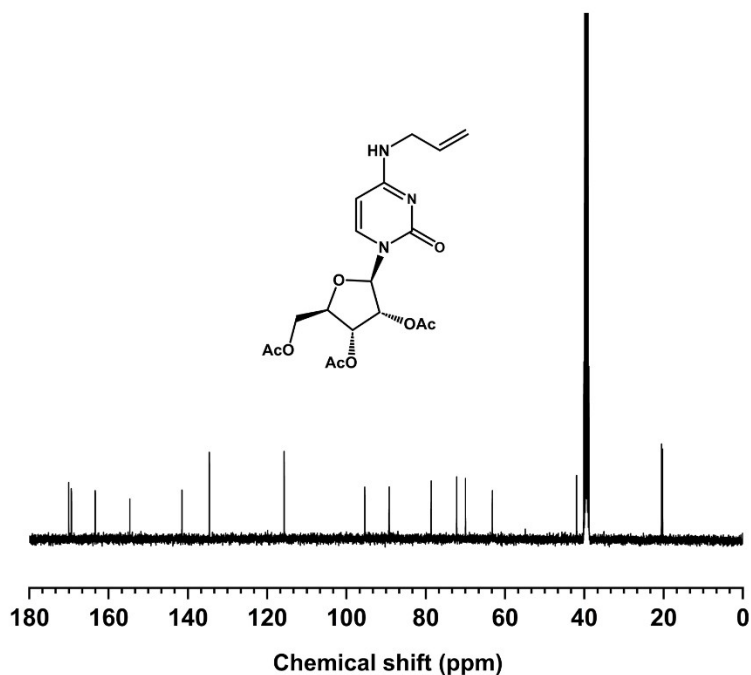

**Figure S5.**  $^{13}\text{C}$  NMR spectrum of 2',3',5'-tri-*O*-acetyl- $N^4$ -allylcytidine (**3**).  $^{13}\text{C}$  NMR (100 MHz,  $\text{DMSO-}d_6$ ),  $\delta$  (ppm): 170.1, 169.4, 169.3, 163.4, 154.6, 141.5, 134.6, 115.7, 95.4, 89.2, 78.6, 72.2, 70.0, 63.2, 42.0, 20.5, 20.3, 20.2

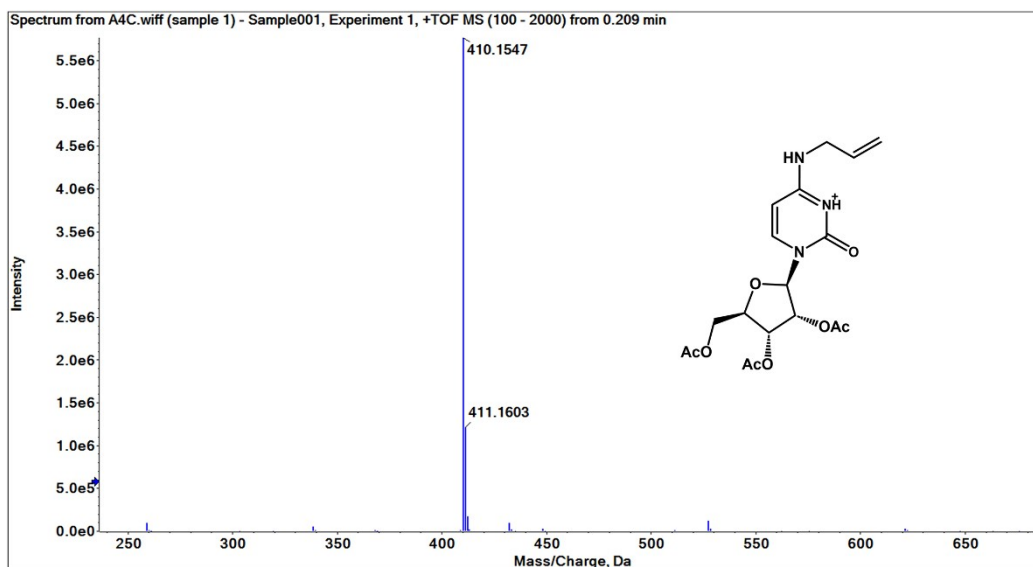

**Figure S6.** High-resolution mass spectrum of 2',3',5'-tri-O-acetyl-*N*<sup>4</sup>-allylcytidine (**3**). HRMS (ESI), *m/z* 410.1547 ([*M*+*H*]<sup>+</sup>, calcd 410.1558).

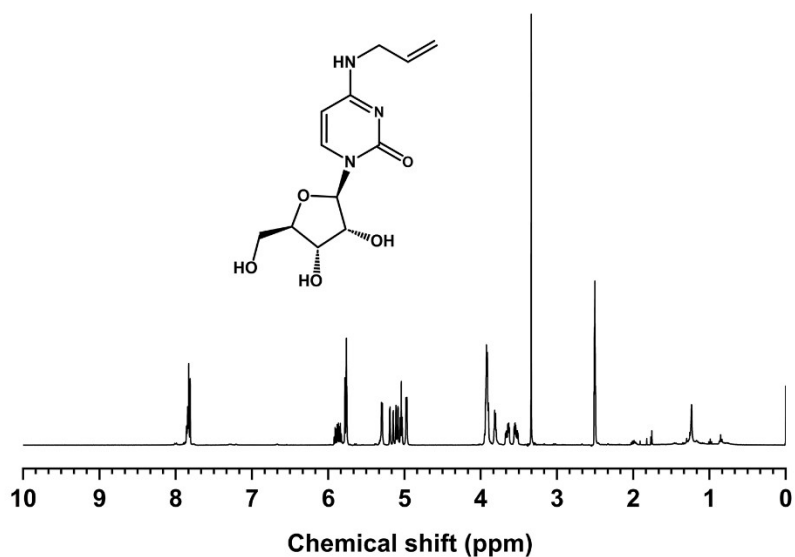

**Figure S7.** <sup>1</sup>H NMR spectrum of *N*<sup>4</sup>-allylcytidine (**4**). <sup>1</sup>H NMR spectrum (400 MHz, DMSO-*d*<sub>6</sub>),  $\delta$  (ppm): 7.74 – 7.90 (m, 2H), 5.87 (s, 1H), 5.76 (s, 2H), 5.30 (d, *J* = 5.2 Hz, 1H), 5.17 (dd, *J* = 1.8, 17.2 Hz, 1H), 5.10 (dd, *J* = 1.7, 10.2 Hz, 1H), 5.01 – 5.06 (m, 1H), 4.97 (d, *J* = 5.3 Hz, 1H), 3.92 (h, *J* = 4.4 Hz, 4H), 3.82 (t, *J* = 3.2 Hz, 1H), 3.64 (dt, *J* = 4.2, 8.4 Hz, 1H), 3.48 – 3.59 (m, 1H).

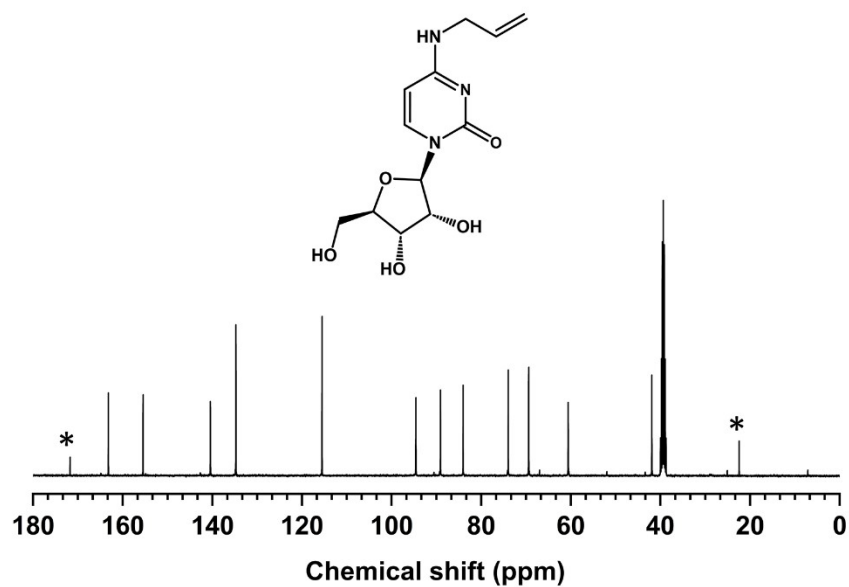

**Figure S8.**  $^{13}\text{C}$  NMR spectrum of  $N^4$ -allylcytidine (**4**).  $^{13}\text{C}$  NMR spectrum (100 MHz,  $\text{DMSO-}d_6$ ),  $\delta$  (ppm): 163.2, 155.5, 140.4, 134.8, 115.5, 94.6, 89.1, 84.0, 74.0, 69.4, 60.6, 41.9. The asterisks (\*) denote the signals from acetic acid.

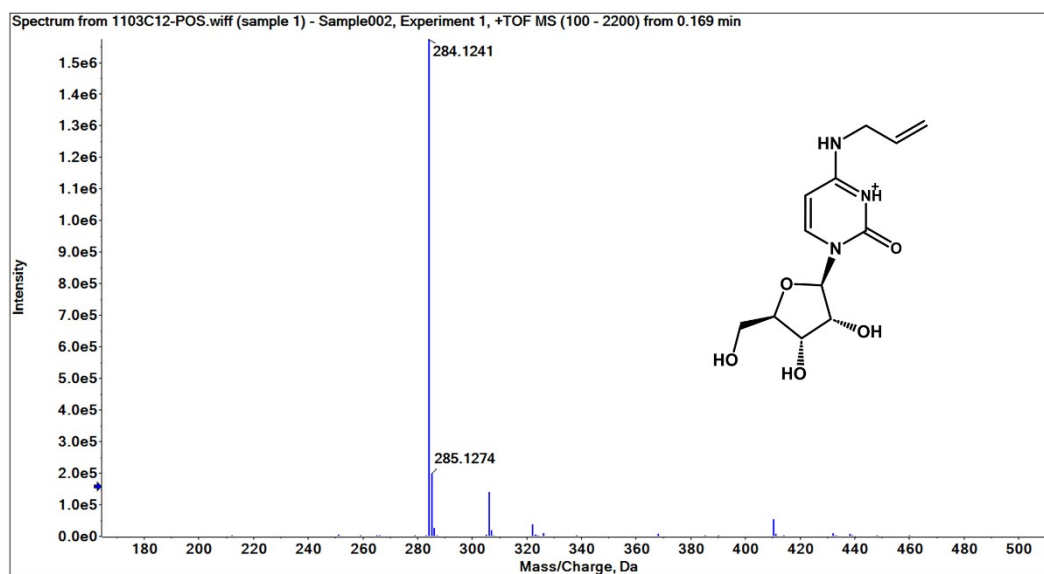

**Figure S9.** High-resolution mass spectrum of  $N^4$ -allylcytidine (**4**). HRMS (ESI),  $m/z$  284.1241 ( $[\text{M}+\text{H}]^+$ , calcd 284.1241).

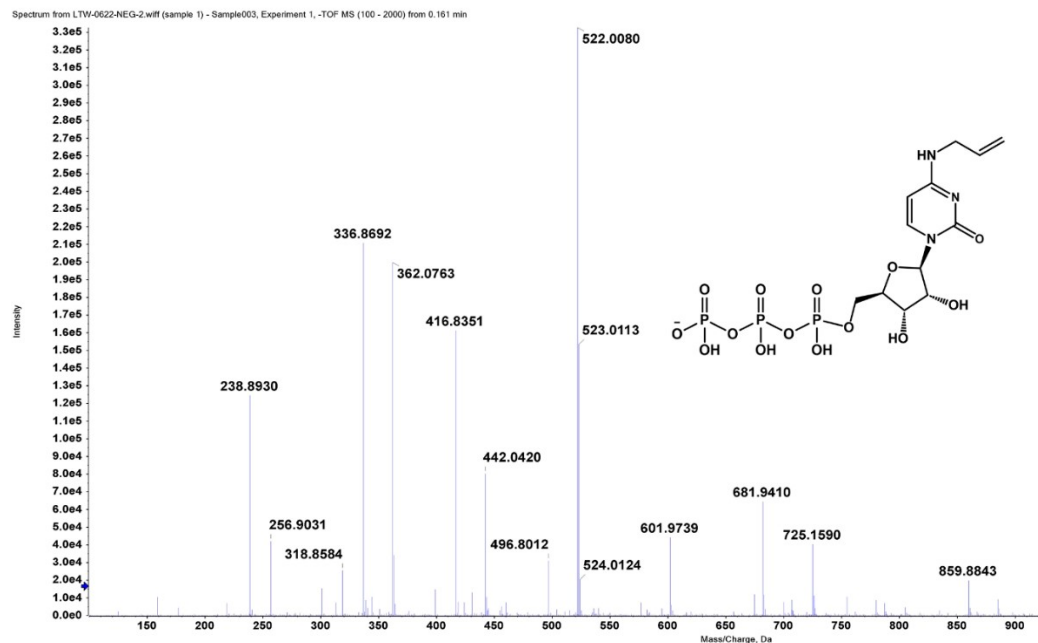

## Section II: Model reactions of a<sup>4</sup>C

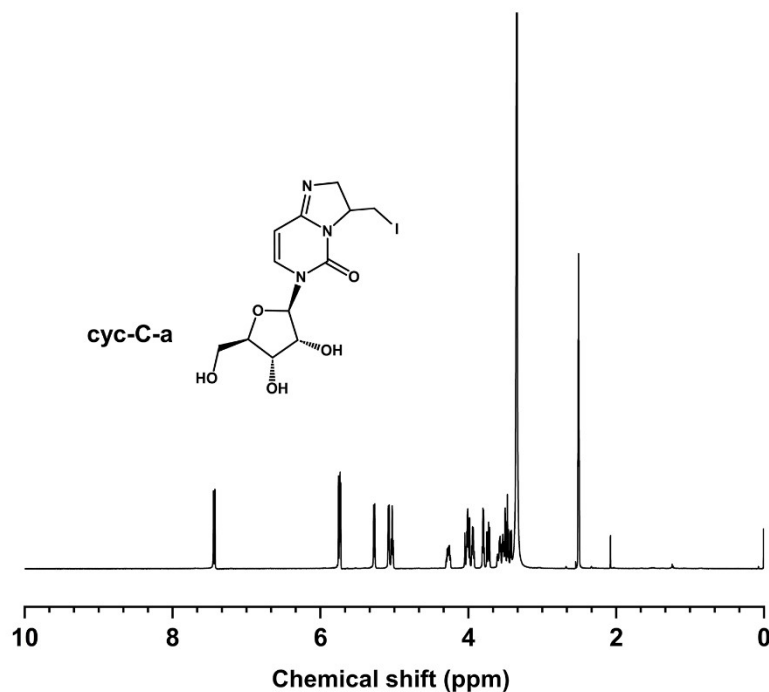

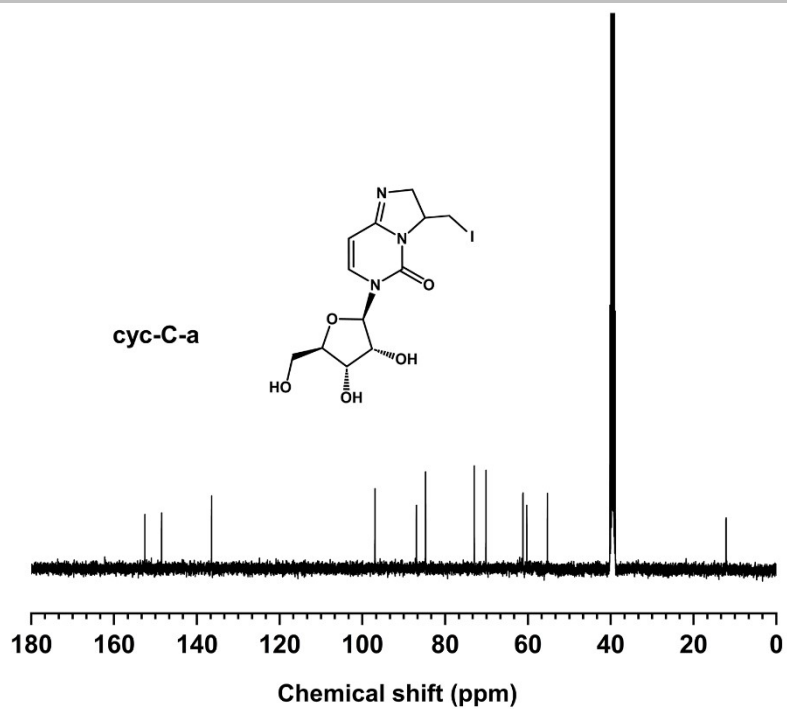

**Figure S12.**  $^{13}\text{C}$  NMR spectrum (100 MHz,  $\text{DMSO-}d_6$ ) of 3,  $N^4$ -cyclized cytidine (cyc-C-a).  $\delta$  (ppm): 152.5, 148.5, 136.4, 96.9, 86.9, 84.7, 73.0, 70.1, 61.2, 60.3, 55.3, 12.1.

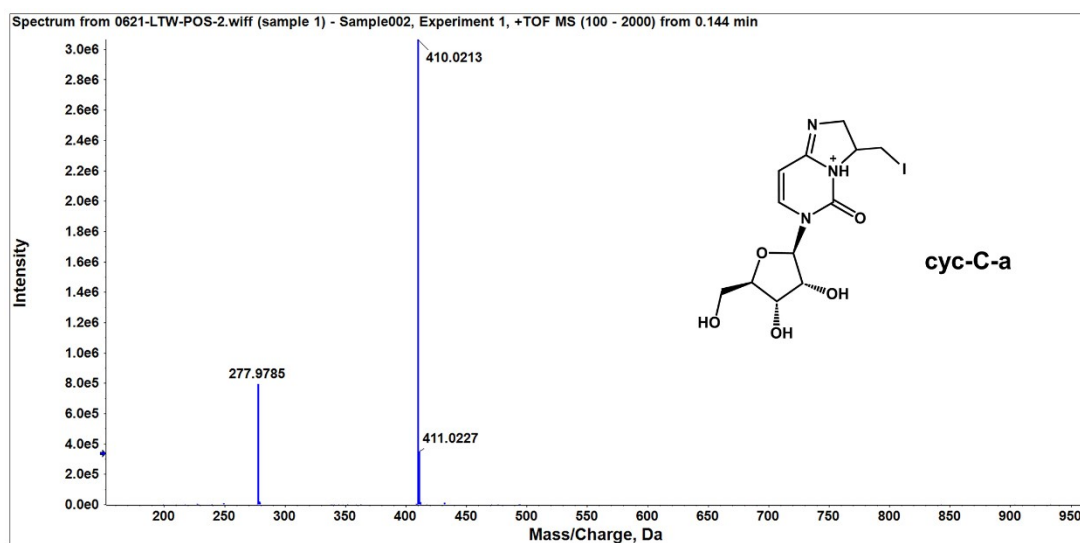

**Figure S13.** High-resolution mass spectrum of 3,  $N^4$ -cyclized cytidine (cyc-C-a). HRMS (ESI),  $m/z$  410.0213 ( $[\text{M}+\text{H}]^+$ , calcd 410.0207).



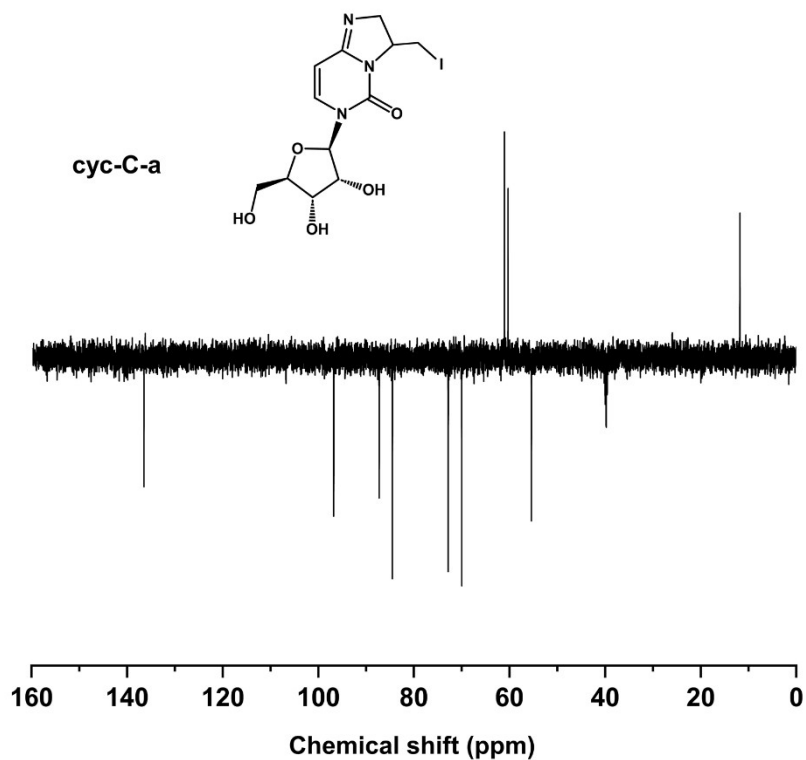

**Figure S14.** DEPT spectrum of 3, *N*<sup>4</sup>-cyclized cytidine (cyc-C-a).  $\delta$  (ppm): 135.9, 96.5, 87.0, 84.2, 72.6, 69.7, 60.8, 60.0, 55.2, 11.5

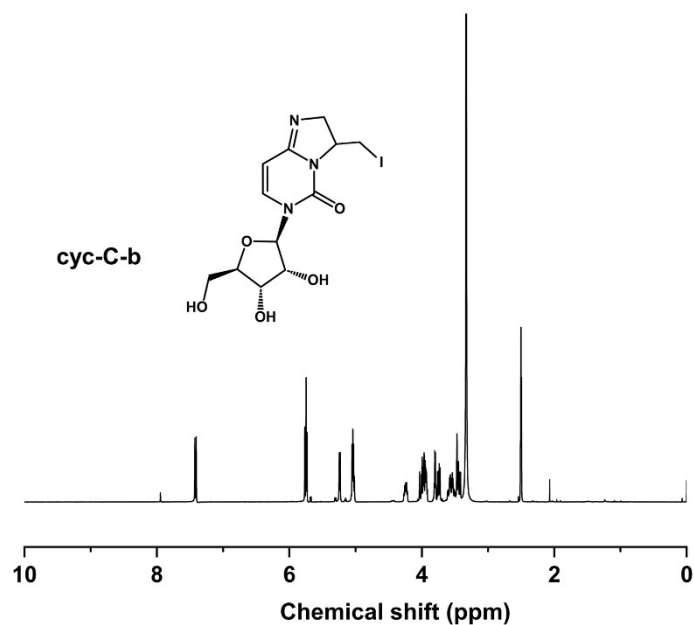

**Figure S15.** <sup>1</sup>H NMR spectrum (400 MHz, DMSO-*d*<sub>6</sub>) of 3, *N*<sup>4</sup>-cyclized cytidine (cyc-C-b).  $\delta$  (ppm): 7.42 (d, *J* = 8.2 Hz, 1H), 5.84 – 5.69 (m, 2H), 5.24 (d, *J* = 5.8 Hz, 1H), 5.04 (p, *J* = 5.3 Hz, 2H), 4.25 (dtd, *J* = 10.6, 5.4, 2.1 Hz, 1H), 4.05 – 3.90 (m, 3H), 3.80 (q, *J* = 3.3 Hz, 1H), 3.75 (dd, *J* = 10.2, 5.3 Hz, 1H), 3.56 (qdd, *J* = 12.0, 5.1, 3.5 Hz, 2H), 3.47 (d, *J* = 2.3 Hz, 1H), 3.46 – 3.40 (m, 1H).

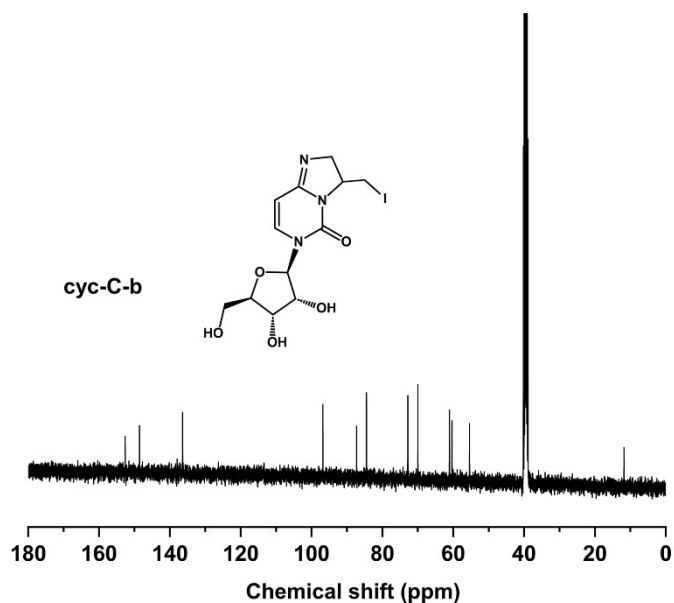

**Figure S16.**  $^{13}\text{C}$  NMR spectrum (100 MHz,  $\text{DMSO-}d_6$ ) of 3,  $N^4$ -cyclized cytidine (cyc-C-b).  $\delta$  (ppm): 152.6, 148.5, 136.4, 96.8, 87.2, 84.4, 72.8, 70.0, 61.0, 60.3, 55.4, 11.7.

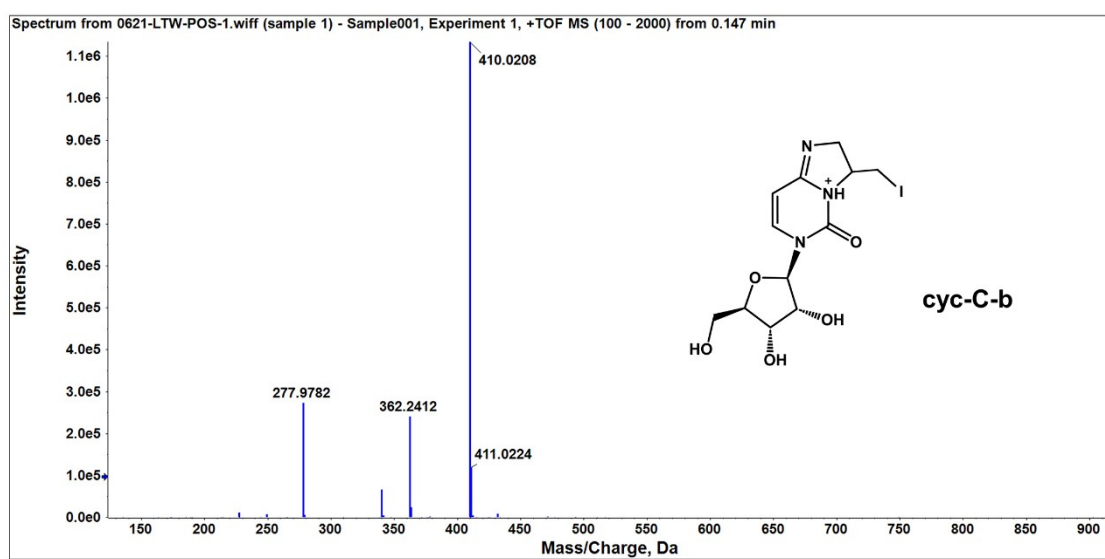

**Figure S17.** High-resolution mass spectrum of 3,  $N^4$ -cyclized cytidine (cyc-C-b). HRMS (ESI),  $m/z$  410.0208 ( $[\text{M}+\text{H}]^+$ , calcd 410.0207).

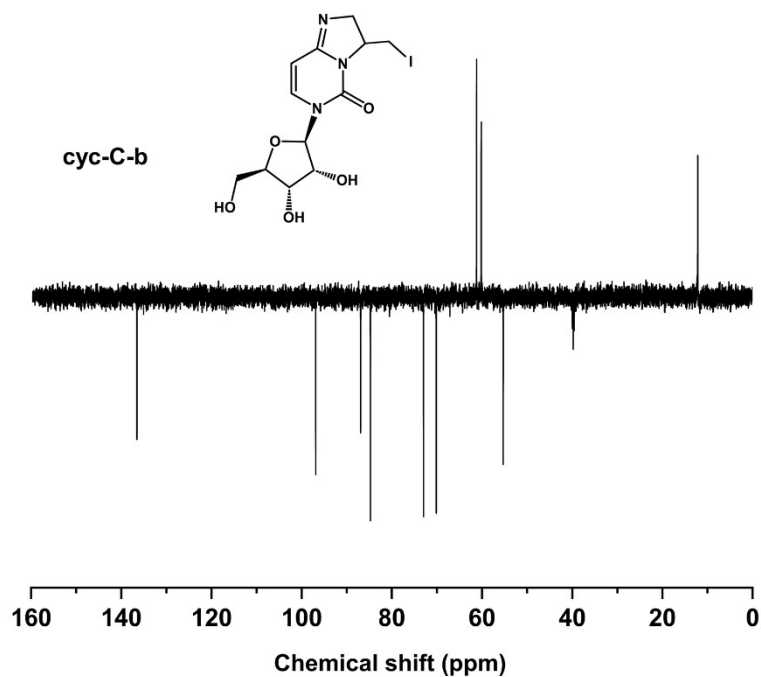

**Figure S18.** DEPT spectrum of 3, *N*<sup>4</sup>-cyclized cytidine (cyc-C-a).  $\delta$  (ppm): 136.3, 96.6, 86.7, 84.5, 72.7, 69.9, 60.9, 59.9, 55.1, 11.9.

### Section III: Applications of a<sup>4</sup>C in RNA sequencing

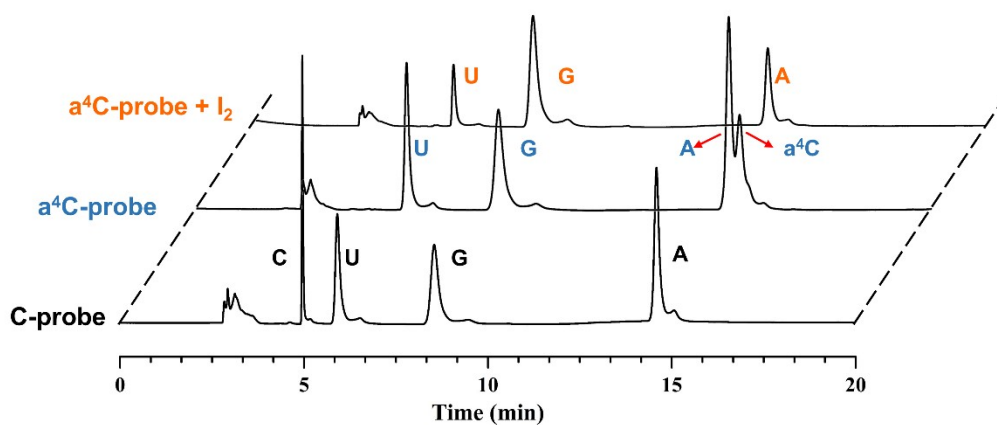

**Figure S19.** HPLC chromatograms of hydrolysed RNA C-probe, a<sup>4</sup>C-probe and iodine-treated a<sup>4</sup>C-probe .

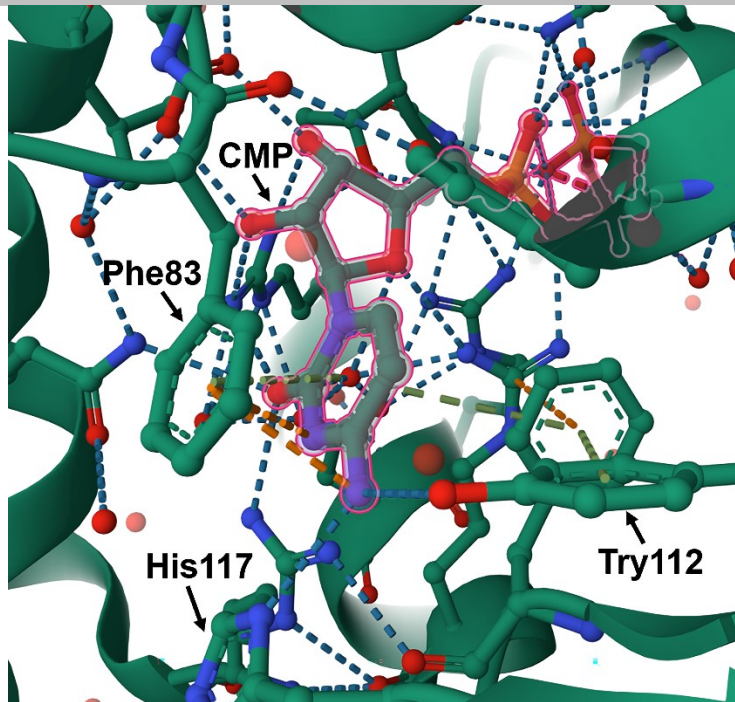

**Figure S20.** The X-ray crystal structure of UCK2 with the substrate cytidine monophosphate (CMP). This is adapted from the structure with PDB code 1XRJ (<https://doi.org/10.2210/pdb1xrj/pdb>).

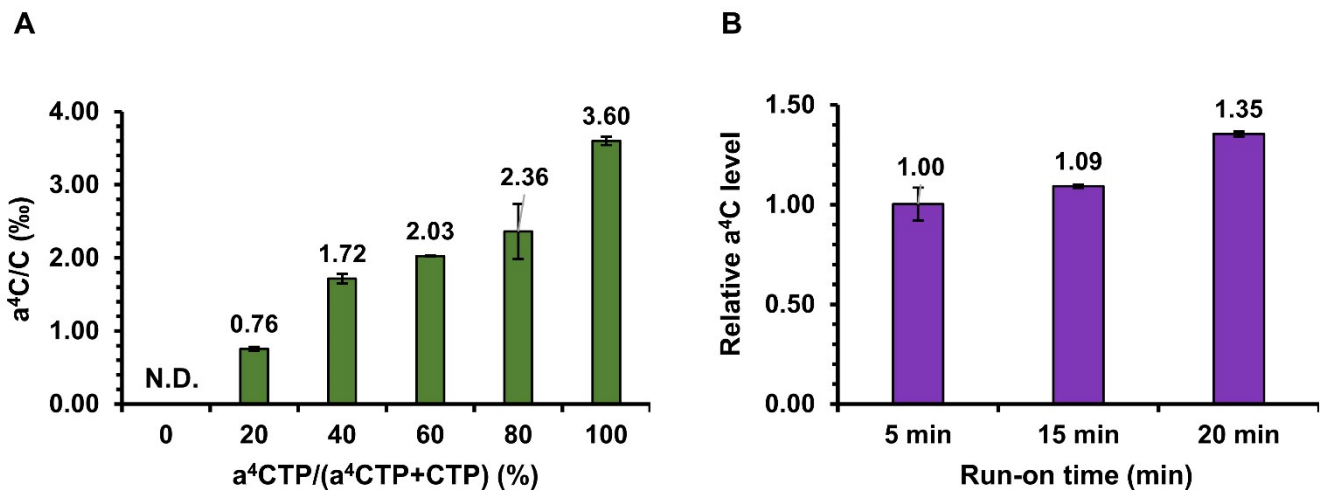

**Figure S21.** (A) The a<sup>4</sup>C incorporation levels in RNA extracted from chromatin run-on reactions under different a<sup>4</sup>CTP/CTP feeding ratios within 5 min. (B) The measured time course a<sup>4</sup>C levels of RNAs extracted from chromatin run-on reactions in the presence of 100% a<sup>4</sup>CTP.

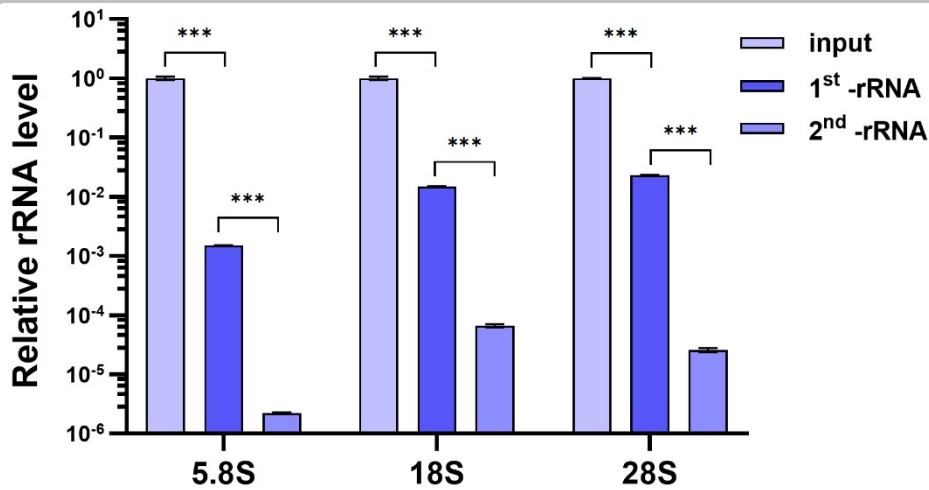

Figure S22. Quantification of different kinds of rRNAs after rRNA depletion by RT-qPCR.

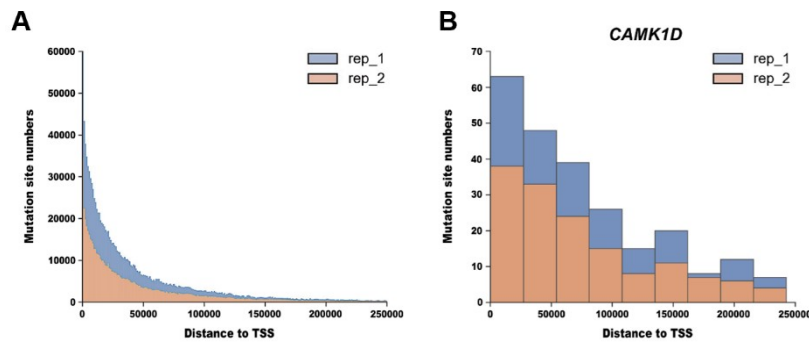

Figure S23. (A) The cumulative mutation site numbers (C-to-T) around RefSeq TSS by 50 bp-windows in a<sup>4</sup>C-ChRO-seq using HIV 733 enzyme. (B) The cumulative mutation site numbers (C-to-T) of *CAMK1D* in a<sup>4</sup>C-ChRO-seq around RefSeq TSS by 50 bp-windows.

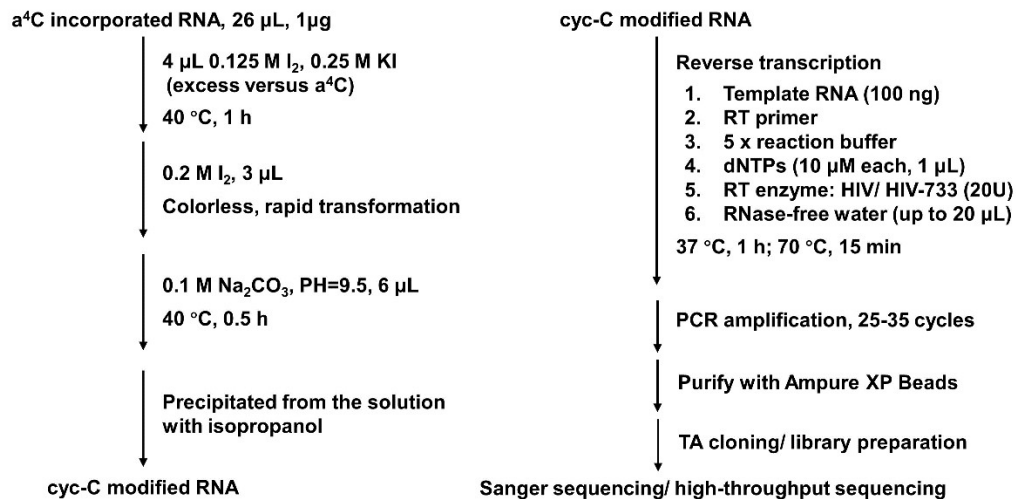

Scheme S1. Flowchart of a<sup>4</sup>C chemical sequencing in RNA.

**Table S1.** RNA probes used for *in vitro* chemical sequencing and enzyme-assisted labelling. IVT: *in vitro* transcription.

| Name                         | Sequence (5'-3')                                                                                                                                                                                                                                                                                                                                          | Length (nt) | Source | Purification                          |
|------------------------------|-----------------------------------------------------------------------------------------------------------------------------------------------------------------------------------------------------------------------------------------------------------------------------------------------------------------------------------------------------------|-------------|--------|---------------------------------------|
| 327nt-a <sup>4</sup> C-probe | GGGAGATTAGGGTTAGGCGTTTTGCGCTGCTTCGCGATGTACGGGCCAGATATACGCGTT<br>GACATTGATTATTGACTAGTTATTAATAGTAATCAATTACGGGGTCATTAGTTCATAGCCCA<br>TATATGGAGTCCGCGTTACATAACTTACGGTAAATGGCCCGCTGGCTGACCGCCCAACG<br>ACCCCGCCCAATTGACGTCAATAATGACGTATGTTCCCATAGTAACGCCAATAGGGACTTT<br>CCATTGACGTCAATGGGTGGACTATTTACGGTAAACTGCCCACTTGGCAGTACATCAAGTG<br>TATCATATGCCAAGTACGCCCC | 327         | IVT    | Zymo Research RNA-Clean& Concentrator |
| 150nt-12S-mt-rRNA            | GGGCTAAGAGTAGAGTGCTTAGTTGAACAGGGCCCTGAAGCGCGTACACACCGCCCGTCA<br>CCCTCCTCAAGTATACTTCAAAGGACATTTAACTAAAACCCCTACGCATTTATATAGAGGA<br>GACAAGTCGTAACATGGTAAGTACTG                                                                                                                                                                                               | 150         | IVT    | Zymo Research RNA-Clean& Concentrator |

**Table S2.** DNA primers used in this work.

| Name        | Sequence (5'-3')                                 | Purification |
|-------------|--------------------------------------------------|--------------|
| 327-PCR-F   | CGTAATACGACTCACTATAGGGAGATTAGGGTTAGGCGTTTTGCGCTG | PAGE         |
| 327-PCR-F   | GGGGCGTACTTGGCATATGATACACTTGAT                   | PAGE         |
| 150-PCR-F   | TAATACGACTCACTATAGGGCTAAGAGTAGAGTGCTTAGTTGAACAGG | PAGE         |
| 150-PCR-F   | CCAGTACACTTACCATGTTACGACTTG                      | PAGE         |
| GAPDH-qF    | AGAAGGCTGGGGCTCATTG                              | PAGE         |
| GAPDH-qR    | AGGGGCCATCCACAGTCTTC                             | PAGE         |
| rRNA5.8S-qF | TTAGCGGTGGATCACTCGG                              | PAGE         |
| rRNA5.8S-qR | GCAAGTGCCTCGAAGTGTC                              | PAGE         |
| rRNA18S-qF  | GCGCGCAAATTACCCACTC                              | PAGE         |
| rRNA18S-qR  | CTCCAATGGATCCTCGTTAAAGG                          | PAGE         |
| rRNA28S-qF  | CCAGGGGAATCCGACTGTTTA                            | PAGE         |
| rRNA28S-qR  | CGTTTACCCGCGCTTCATTG                             | PAGE         |
